# Supplementary material for: Impact of the Pre-transplant Circulatory Supportive Strategy on Post-transplant Outcome: Double Bridge May Work
Source: Preprints.org preprint supplement (doi:10.20944/preprints202109.0106.v1), 2021-09-06
Supplement: Supplementary file 1 [file supplementary]

**Table 1. Key hepatic and renal biomarkers in the study group after transplantation**

|  | Without MCS | With MCS | *p* | Total |
| --- | --- | --- | --- | --- |
| Patient, n (%) | 115 (45.8) | 136 (54.2) |  | 251 |
| Total Bilirubin, (mg/dL ± SD) |  |  |  |  |
| Time of index admission | 1.9 ± 1.4 | 2.6 ± 2.8 | 0.042 | 2.3 ± 2.3 |
| Pre-HTx | 2.6 ± 8.3 | 3.1 ± 4.3 | 0.551 | 2.9 ± 6.3 |
| 1-month after HTx | 1.4 ± 4.9 | 1.4 ± 2.7 | 0.884 | 1.4 ± 3.9 |
| 3-month after HTx | 0.7 ± 0.3 | 1.3 ± 4.4 | 0.187 | 1.0 ± 3.2 |
| 6-month after HTx | 0.8 ± 0.5 | 0.7 ± 0.4 | 0.025 | 0.8 ± 0.4 |
| 9-month after HTx | 0.8 ± 0.4 | 0.7 ± 0.3 | 0.011 | 0.7 ± 0.3 |
| 1-year after HTx | 0.8 ± 0.5 | 0.7 ± 0.4 | 0.200 | 0.8 ± 0.4 |
| 3-year after Htx | 0.7 ± 0.3 | 0.7 ± 0.3 | 0.617 | 0.7 ± 0.3 |
| Creatinine, (mg/dL ± SD) |  |  |  |  |
| Time of index admission | 1.6 ± 1.7 | 1.7 ± 1.0 | 0.394 | 1.6 ± 1.3 |
| Pre-HTx | 1.5 ± 1.6 | 1.5 ± 1.0 | 0.941 | 1.5 ± 1.3 |
| 1-month after HTx | 1.5 ± 1.4 | 1.5 ± 1.0 | 0.796 | 1.5 ± 1.2 |
| 3-month after HTx | 1.5 ± 1.2 | 1.8 ± 1.4 | 0.110 | 1.6 ± 1.3 |
| 6-month after HTx | 1.7 ± 1.8 | 1.9 ± 1.6 | 0.388 | 1.8 ± 1.7 |
| 9-month after HTx | 1.7± 1.7 | 1.9 ± 1.7 | 0.306 | 1.8± 1.7 |
| 1-year after HTx | 1.6 ± 1.7 | 1.9 ± 1.7 | 0.300 | 1.7 ± 1.7 |
| 3-year after Htx | 1.7± 2.0 | 1.7± 1.4 | 0.915 | 1.7 ± 1.8 |

HTx: heart transplantation, MCS: mechanical circulatory support, SD: standard deviation.

**Supplement Table 2：Creatinine and Bilirubin data of MCS bridge to HTx subgroups**

|  | IABP | ECMO | ECMO-VAD | VAD | *p* | Total |
| --- | --- | --- | --- | --- | --- | --- |
| Patient, n (%) | 15 (11) | 33 (24.3) | 59 (43.4) | 29 (21.3) |  | 136 |
| **Creatinine, (mg/dL mean± SD)** |  |  |  |  |  |  |
| Time of admission | 1.7 ± 1.2 | 1.8 ± 0.9 | 1.6 ± 0.9 | 1.7 ± 1.1 | *0.872* | 1.7 ± 1.0 |
| Time of MCS | 1.6 ± 1.0 | 2.1 ± 1.0 | 1.7 ± 1.0 (E)  1.8 ± 1.0(V) | 2.1 ± 1.2 | *0.487* | 1.9 ± 1.1 |
| Pre-HTx | 1.3 ± 0.8 | 1.8 ± 1.2 | 1.4 ± 1.1 | 1.3 ± 0.9 | *0.251* | 1.5 ± 1.0 |
| 1-month after HTx | 1.6 ± 1.1 | 1.4 ± 0.7 | 1.5 ± 1.0 | 1.4 ± 1.2 | *0.927* | 1.5 ± 1.0 |
| 3-month after HTx | 1.9 ±1.4 | 1.7 ± 0.8 | 1.9 ± 1.7 | 1.6 ± 1.4 | *0.699* | 1.8 ± 1.4 |
| 6-month after HTx | 2.0 ± 2.2 | 1.9 ± 1.9 | 2.0 ± 1.6 | 1.8 ± 1.3 | *0.955* | 1.9 ± 1.6 |
| 9-month after HTx | 2.2 ± 3.2 | 1.6 ± 0.7 | 1.8 ± 1.4 | 2.1 ± 2.1 | *0.771* | 1.9 ± 1.7 |
| 1-year after HTx | 2.1 ± 2.7 | 1.5 ± 0.6 | 1.8 ± 1.5 | 2.0 ± 2.0 | *0.769* | 1.9 ± 1.7 |
| 3-year after HTx | 1.3 ± 0.6 | 1.5 ± 0.6 | 1.6 ± 1.1 | 2.2 ± 2.5 | *0.496* | 1.7 ± 1.4 |
| **Bilirubin, (mg/dL mean ± SD)** |  |  |  |  |  |  |
| Time of admission | 2.6 ± 1.8 | 3.1 ± 2.8 | 2.7 ± 3.5 | 1.9 ± 1.5 | *0.551* | 2.6 ± 2.8 |
| Time of MCS | 3.4 ± 2.3 | 3.7 ± 4.7 | 2.3 ± 1.5 | 2.5 ± 1.8 | *0.298* | 2.9 ± 3.0 |
| Pre-HTx | 1.5 ± 1.1 | 5.8 ± 6.9 | 2.5 ± 2.8 | 2.2 ± 2.2 | *0.000* | 3.1 ± 4.3 |
| 1-month after HTx | 0.6 ± 0.3 | 2.6 ± 4.9 | 1.0 ± 1.5 | 1.2 ± 1.8 | *0.056* | 1.4 ± 2.7 |
| 3-month after HTx | 0.6 ±0.2 | 2.6 ± 8.8 | 1.0 ±2.3 | 0.7 ± 0.5 | *0.378* | 1.3 ± 4.4 |
| 6-month after HTx | 0.7 ± 0.3 | 0.9 ±0.5 | 0.7 ± 0.3 | 0.7 ± 0.3 | *0.179* | 0.8 ± 0.4 |
| 9-month after HTx | 0.9 ± 0.4 | 0.8 ± 0.3 | 0.6 ± 0.2 | 0.6 ± 0.2 | *0.001* | 0.7 ± 0.3 |
| 1-year after HTx | 0.7 ± 0.4 | 0.9 ± 0.5 | 0.7 ± 0.3 | 0.8 ± 0.6 | *0.390* | 0.7 ± 0.4 |
| 3-year after HTx | 0.7 ± 0.4 | 0.8 ± 0.3 | 0.7 ± 0.3 | 0.6 ± 0.2 | *0.128* | 0.7 ± 0.3 |

CPR*: cardiopulmonary resuscitation, cardiac massage during waiting before transplantation, E: ECMO, ECMO: extracorporeal membrane oxygenation, H/D: hemodialysis, HTx: heart transplantation, IABP: intra-aortic balloon pumping, ICMP: ischemic cardiomyopathy, MCS: mechanical circulatory support, SD: standard deviation, V: VAD, ventricular assist device
